# Supplementary figures and images for: Dechlorination of hexachlorobenzene by nano zero-valent iron/activated carbon composite: iron loading, kinetics and pathway
Source: Royal Society of Chemistry journal article supplement (doi:10.1039/c4ra06760f), 2014-01-01

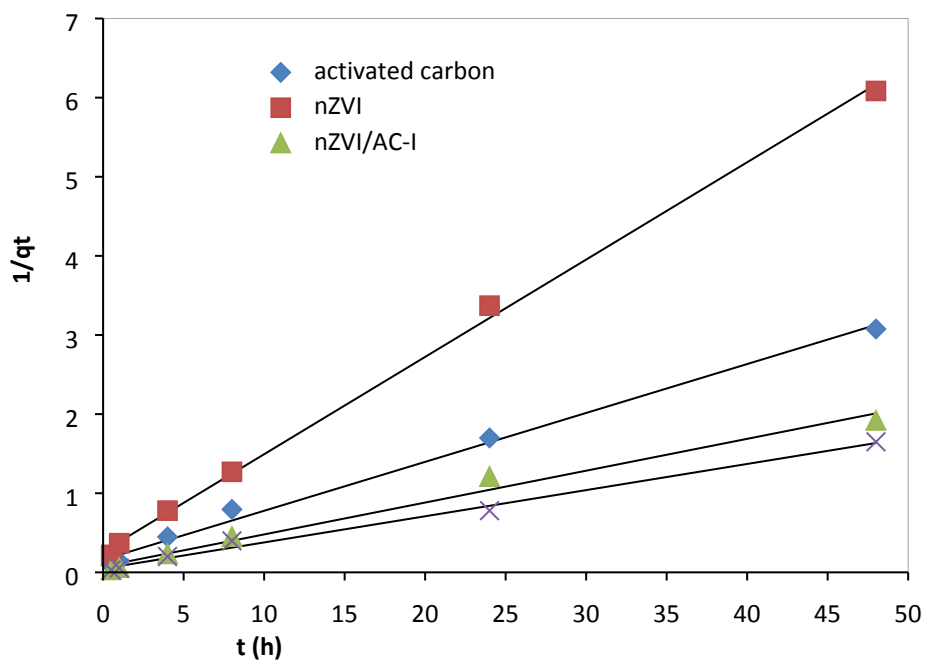

SI Fig.1: Linear plot second-order reaction model fitting

Supplement: c4ra06760f1.pdf [file c4ra06760f1.pdf]
